# Supplementary material for: The relationship between health IT characteristics and organizational variables among German healthcare workers
Source: Research Square preprint supplement (doi:10.21203/rs.3.rs-504035/v1), 2021-05-11
Supplement: Supplementary file 1 [file 4bca5298b812c683a42d4b10.pdf]

## SUPPLEMENTARY INFORMATION

for

**The relationship between health IT characteristics and organizational variables among  
German healthcare workers**Susanne Gaube<sup>1,2,3\*</sup>, Julia Cecil<sup>3</sup>, Simon Wagner<sup>3</sup>, and Andreas Schicho<sup>4</sup>**Author Note**

<sup>1</sup>Department of Infection Prevention and Infectious Diseases, University Hospital  
Regensburg, Regensburg, Germany.

<sup>2</sup>LMU Center for Leadership and People Management, LMU Munich, Munich, Germany.

<sup>3</sup>Department of Psychology, University of Regensburg, Regensburg, Germany.

<sup>4</sup>Department of Radiology, University Hospital Regensburg, Regensburg, Germany.

\*Correspondence to: [susanne.gaube@ukr.de](mailto:susanne.gaube@ukr.de)

**The file contains:**

Table S1: List of scales and items used in the survey

Figure S1: Most widely used health information technologies

**Table S1**

List of scales and items used in the survey

| Scale<br>Items                                                                                                                                                                                                                                          | <i>M (SD)</i> |
|---------------------------------------------------------------------------------------------------------------------------------------------------------------------------------------------------------------------------------------------------------|---------------|
| <b>Technologies in use</b>                                                                                                                                                                                                                              | n.a.          |
| <i>Instruction: Which of the following health information technologies (HITs) do you regularly use in your daily work? Multiple selection possible. Note: The names of the technologies vary with the providers, so only over-categories are given.</i> |               |
| Electronic health record                                                                                                                                                                                                                                |               |
| Hospital information system                                                                                                                                                                                                                             |               |
| Image archive                                                                                                                                                                                                                                           |               |
| Radiology information system                                                                                                                                                                                                                            |               |
| Mobile digital medical technology                                                                                                                                                                                                                       |               |
| Large digital devices                                                                                                                                                                                                                                   |               |
| Laboratory information system                                                                                                                                                                                                                           |               |
| Others                                                                                                                                                                                                                                                  |               |
| <b>Usability: Usefulness</b>                                                                                                                                                                                                                            | 5.26 (1.46)   |
| Use of HITs enables me to accomplish tasks more quickly.                                                                                                                                                                                                |               |
| Use of HITs improves the quality of my work.                                                                                                                                                                                                            |               |
| Use of HITs makes it easier to do my job.                                                                                                                                                                                                               |               |
| Use of HITs enhances my effectiveness on the job.                                                                                                                                                                                                       |               |
| <b>Usability: Ease of use</b>                                                                                                                                                                                                                           | 4.9 (1.24)    |
| Learning to use HITs is easy for me.                                                                                                                                                                                                                    |               |
| HITs are easy to use.                                                                                                                                                                                                                                   |               |
| It is easy to get results that I desire from HITs.                                                                                                                                                                                                      |               |
| <b>Usability: Reliability</b>                                                                                                                                                                                                                           | 4.22 (1.47)   |
| The features provided by HITs are dependable.                                                                                                                                                                                                           |               |
| The capabilities provided by HITs are reliable.                                                                                                                                                                                                         |               |
| HITs behave in a highly consistent way.                                                                                                                                                                                                                 |               |
| <b>Technostress: Techno-overload</b>                                                                                                                                                                                                                    | 3.45 (1.47)   |
| I am forced by this HIT to work much faster.                                                                                                                                                                                                            |               |
| I am forced by this HIT to do more work than I can handle.                                                                                                                                                                                              |               |
| I am forced by this HIT to work with very tight time schedules.                                                                                                                                                                                         |               |
| I am forced to change my work habits to adapt to new HITs.                                                                                                                                                                                              |               |
| I have a higher workload because of increased technology complexity.                                                                                                                                                                                    |               |

| Scale<br>Items                                                                                                             | <i>M (SD)</i> |
|----------------------------------------------------------------------------------------------------------------------------|---------------|
| <b>Technostress: Techno-uncertainty</b>                                                                                    | 3.97 (1.20)   |
| There are always new developments in the technologies we use in our organization.                                          |               |
| There are constant changes in computer software in our organization.                                                       |               |
| There are constant changes in computer hardware in our organization.                                                       |               |
| There are frequent upgrades in computer networks in our organization.                                                      |               |
| <b>Technostress: Techno-insecurity</b>                                                                                     | 1.73 (0.85)   |
| I have to constantly update my skills to avoid being replaced.                                                             |               |
| I am threatened by coworkers with newer technology skills.                                                                 |               |
| I do not share my knowledge with my coworkers for fear of being replaced.                                                  |               |
| I feel there is less sharing of knowledge among coworkers for fear of being replaced.                                      |               |
| <b>Technology self-efficacy</b>                                                                                            | 5.07 (1.07)   |
| When I have to learn a new task that is high tech, my first reaction is that I'm sure I can do it.                         |               |
| In terms of my ability to learn new tasks that are high tech, I would describe myself as one of the best in my work group. |               |
| In the past, I have had a great amount of experience (either on or off the job) working on high-tech tasks.                |               |
| I am extremely confident that I can learn to use HITs on my job.                                                           |               |
| HITs will allow me to perform my job better and more efficiently.                                                          |               |
| <b>Strain</b>                                                                                                              | 2.57 (1.48)   |
| I feel drained from activities that require me to use HITs.                                                                |               |
| I feel tired from my HITs activities.                                                                                      |               |
| Working all day with HITs is a strain for me.                                                                              |               |
| I feel burned out from my HITs activities.                                                                                 |               |
| <b>Job satisfaction</b>                                                                                                    | 4.84 (1.18)   |
| <i>Instruction: Regarding your work in general. How pleased are you with....</i>                                           |               |
| ... your work prospects                                                                                                    |               |
| ... the people you work with?                                                                                              |               |
| ... the physical working conditions?                                                                                       |               |
| ... the way your department is run?                                                                                        |               |
| ... the way your abilities are used?                                                                                       |               |
| ... your usual take home pay?                                                                                              |               |
| ... your job as a whole, everything taken into consideration?                                                              |               |

| Scale<br>Items                                                                              | <i>M (SD)</i> |
|---------------------------------------------------------------------------------------------|---------------|
| <b>Error management culture</b>                                                             | 4.58 (1.41)   |
| Out fear of reprimand errors are covered up. (R)                                            |               |
| Errors are discussed openly with colleagues.                                                |               |
| Errors are discussed openly with superiors.                                                 |               |
| Errors are communicated openly to patients and relatives.                                   |               |
| Errors are systematically recorded and documented.                                          |               |
| Possible causes for errors are discussed.                                                   |               |
| Causes of errors are eliminated systematically if possible.                                 |               |
| <b>Common types of medical errors</b>                                                       | n.a.          |
| Error in diagnosis or delay in diagnosis                                                    |               |
| Failure to employ indicated tests                                                           |               |
| Use of outmoded tests or therapy                                                            |               |
| Failure to act on the results of monitoring or testing                                      |               |
| Technical error in the performance of an operation, procedure, or test                      |               |
| Error in administering the treatment (including preparation for treatment or operation)     |               |
| Error in the dose of a drug or in the method of using a drug                                |               |
| Avoidable delay in treatment or in responding to an abnormal test                           |               |
| Inappropriate (not indicated) care.                                                         |               |
| Failure to provide indicated prophylactic treatment                                         |               |
| Inadequate monitoring or follow-up of treatment                                             |               |
| <b>Self-reported medical errors (self)</b>                                                  | 2.19 (1.14)   |
| How often have you made medical errors in the last 3 months?                                |               |
| <b>Consequences of last medical error</b>                                                   | 2.72 (2.39)   |
| What was the outcome of your most recent error?                                             |               |
| <b>Self-reported medical errors (others)</b>                                                | 3.48 (1.58)   |
| How often have you noticed medical errors made by your colleagues in the last three months? |               |

| Scale                                                                                                                        | <i>M (SD)</i> |
|------------------------------------------------------------------------------------------------------------------------------|---------------|
| Items                                                                                                                        |               |
| <b>Perceived reasons for medical errors: Individual and organizational level</b>                                             | n.a.          |
| <i>Instruction: On an individual and organizational level, what do you think are the top three causes of medical errors?</i> |               |
| Lack of knowledge, training or experience                                                                                    |               |
| Poor communication                                                                                                           |               |
| Incorrect risk assessment                                                                                                    |               |
| Inadequate self-reflection / questioning one's own decisions                                                                 |               |
| Distractions and interruptions                                                                                               |               |
| Fatigue / exhaustion                                                                                                         |               |
| Revision / workload / time pressure                                                                                          |               |
| Insufficient resources (e.g. staff)                                                                                          |               |
| Incorrect or missing standards / protocols / guidelines                                                                      |               |
| Inadequate patient participation                                                                                             |               |
| Interpersonal conflicts (e.g. with colleagues or superiors)                                                                  |               |
| Other                                                                                                                        |               |
| <b>Perceived reasons for medical errors: technological level</b>                                                             | n.a.          |
| <i>Instruction: On a technological level, what do you think are the top three causes of medical errors?</i>                  |               |
| There is a lack of instruction and training on how to use the technologies                                                   |               |
| I cannot understand how the technologies work                                                                                |               |
| I have to align my workflow too much with the requirements of technology                                                     |               |
| Technologies take my control and limit my freedoms                                                                           |               |
| The technologies do not work with the common terms and standards                                                             |               |
| Technologies don't adequately warn me of impending errors                                                                    |               |
| The technologies are constructed illogically                                                                                 |               |
| The amount of setting options prevents me from doing my work quickly and adequately                                          |               |
| The user interface is not well designed                                                                                      |               |
| The user interface shows me too much unnecessary information                                                                 |               |
| Questions regarding the operation of the technologies are not adequately answered                                            |               |
| The technologies don't work reliably                                                                                         |               |
| Other                                                                                                                        |               |

*Note.* *N* = 445, HITs = health information technologies, n.a. = not applicable

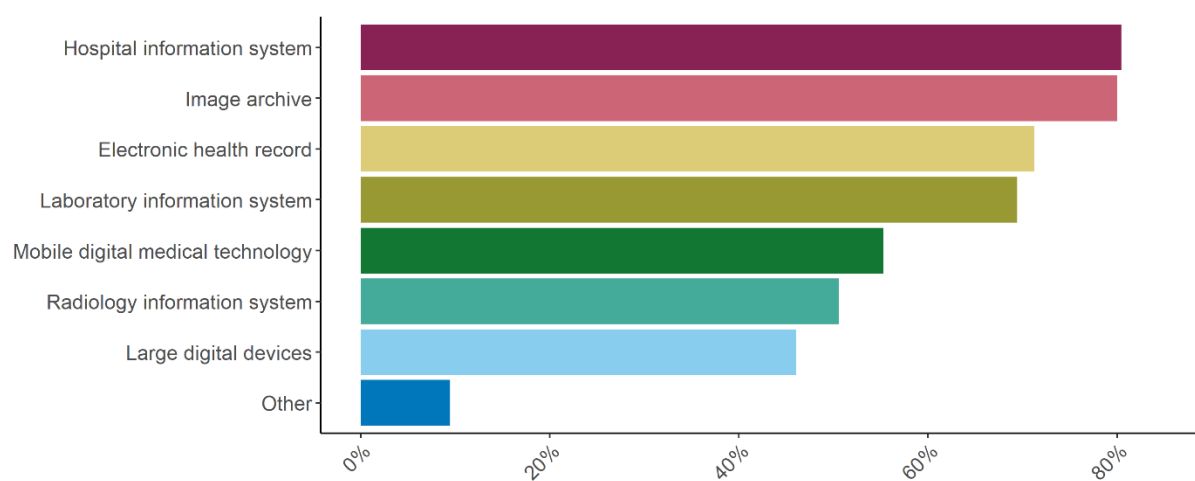

**Figure S1.** Most widely used health information technologies
